# Supplementary material
Source: PubMed Central journal article supplement (PMC7213793)
Supplement: jciinsight-5-135204-s108.pdf [file jciinsight-5-135204-s108.pdf]

A

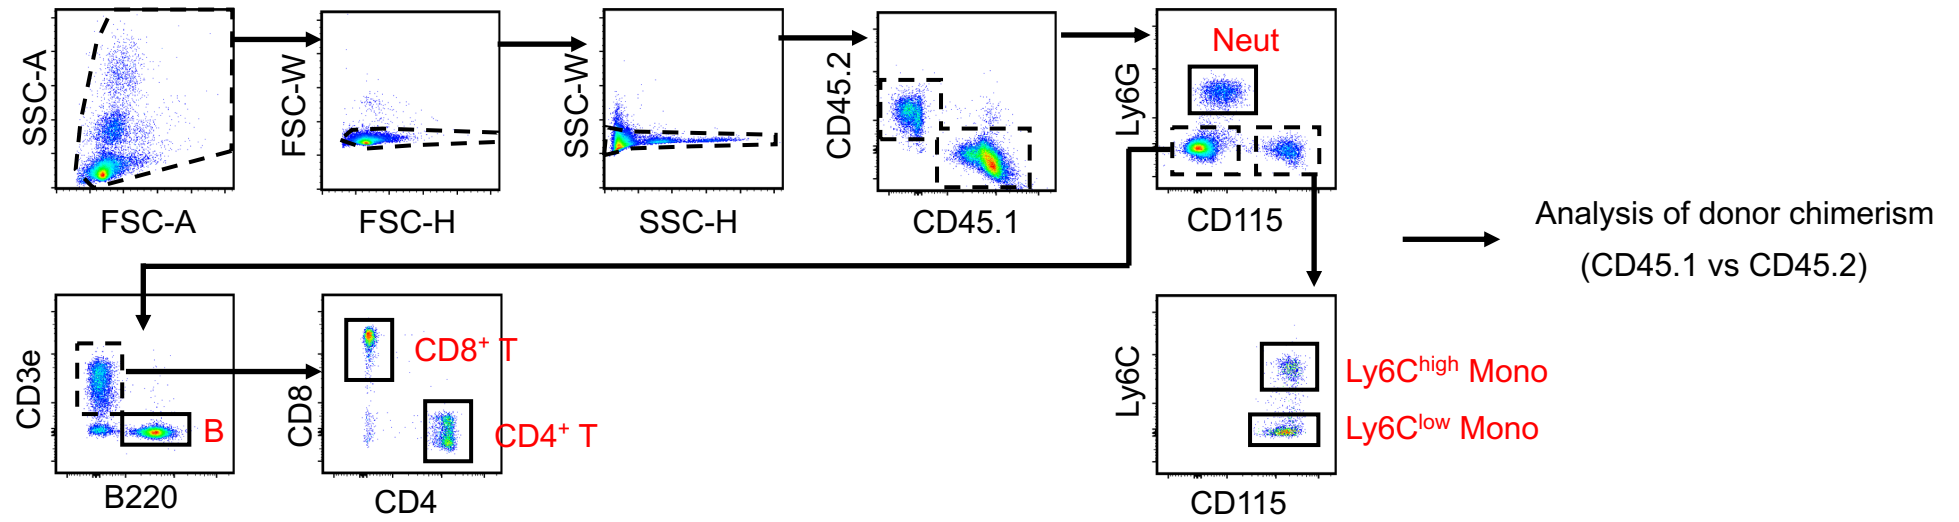

B

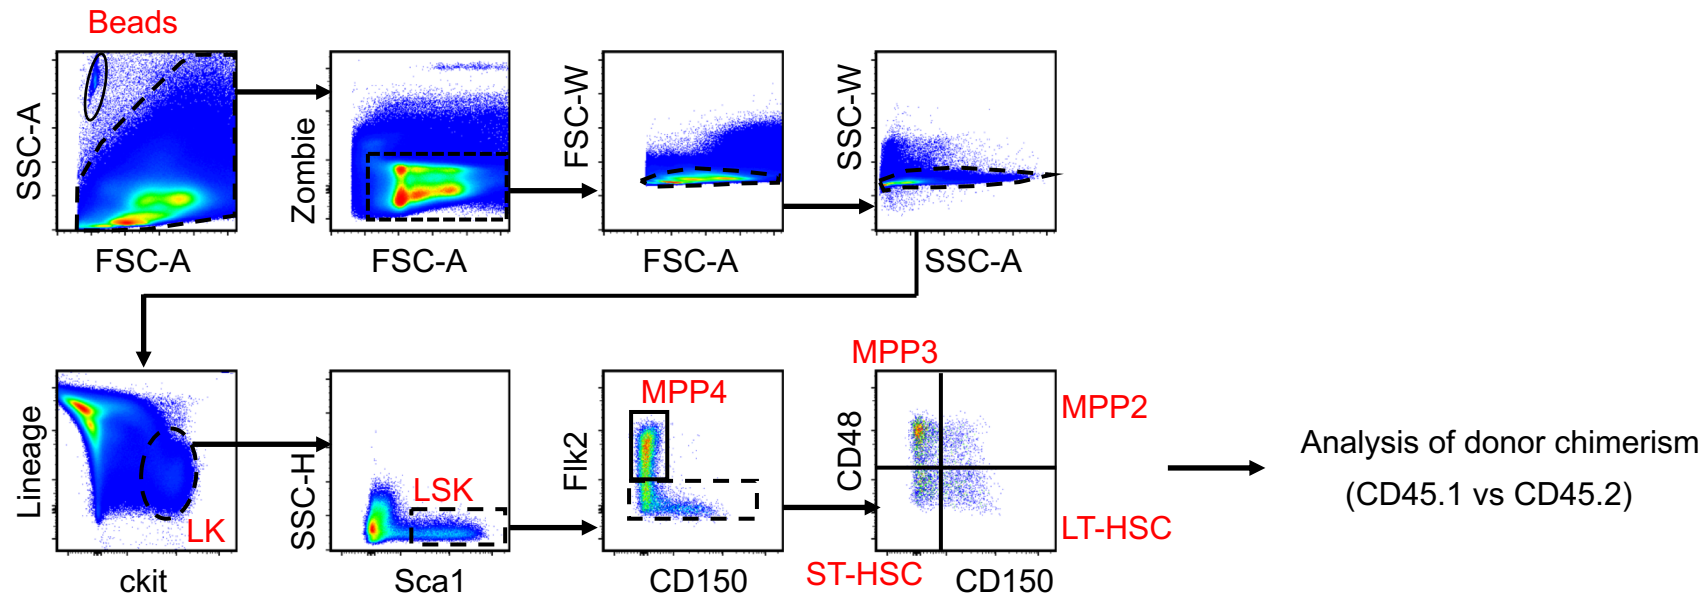

C

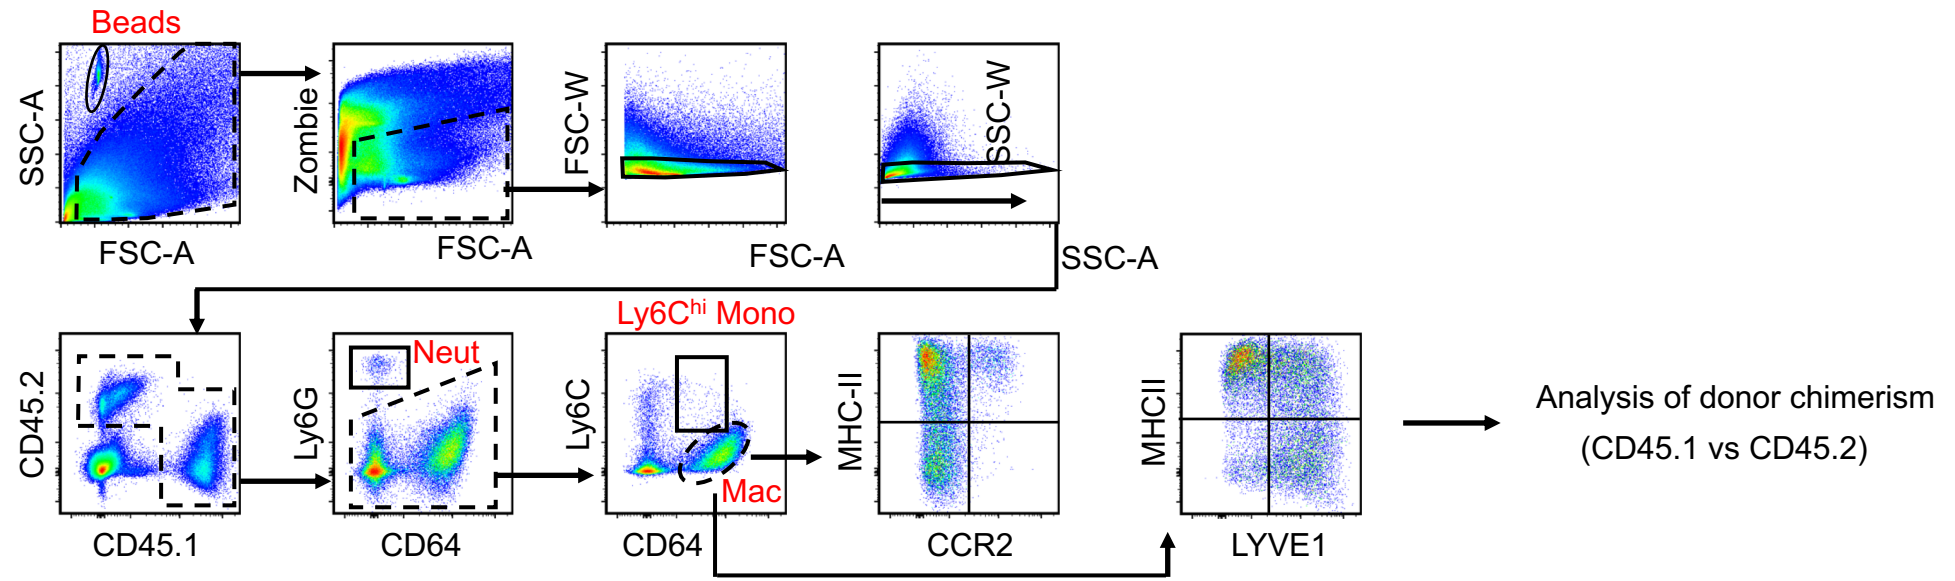

**Supplemental Figure 1. Gating strategy of flow cytometry analysis** shown for **A.** bone marrow hematopoietic cells, **B.** blood and **C.** immune cells in enzymatically digested hearts. Cell populations were defined as: **Bone marrow.** Long-term hematopoietic stem cells (LT-HSC): Lineage<sup>-c</sup>-Kit<sup>+</sup>Sca1<sup>+</sup>CD135<sup>-</sup>CD48<sup>-</sup>CD150<sup>+</sup>, Short-term hematopoietic stem cells (ST-HSC): Lineage<sup>-c</sup>-Kit<sup>+</sup>Sca-1<sup>+</sup>CD135<sup>-</sup>CD48<sup>-</sup>CD150<sup>-</sup>, Multipotent progenitors (MPP)2: Lineage<sup>-c</sup>-Kit<sup>+</sup>Sca1<sup>+</sup>CD135<sup>-</sup>CD48<sup>+</sup>CD150<sup>+</sup>, MPP3: Lineage<sup>-c</sup>-Kit<sup>+</sup>Sca1<sup>+</sup>CD135<sup>-</sup>CD48<sup>+</sup>CD150<sup>-</sup>, MPP4: Lineage<sup>-c</sup>-Kit<sup>+</sup>Sca1<sup>+</sup>CD135<sup>+</sup>CD48<sup>-</sup>CD150<sup>-</sup>; **Blood.** Neutrophils (Neut): CD45<sup>+</sup>CD11b<sup>+</sup>Ly6G<sup>+</sup>, Ly6C high monocytes (Ly6C<sup>hi</sup> mono): CD45<sup>+</sup>CD11b<sup>+</sup>Ly6G<sup>-</sup>Ly6C<sup>hi</sup>, Ly6C low monocytes (Ly6C<sup>lo</sup> mono): CD45<sup>+</sup>CD11b<sup>+</sup>Ly6G<sup>-</sup>Ly6C<sup>lo</sup>, B cell: CD45<sup>+</sup>CD11b<sup>-</sup>B220<sup>+</sup>Ly6C<sup>hi</sup>, CD4<sup>+</sup> T cell: CD45<sup>+</sup>CD11b<sup>-</sup>CD3<sup>+</sup>CD4<sup>+</sup>CD8<sup>-</sup>, CD8<sup>+</sup> T cell: CD45<sup>+</sup>CD11b<sup>-</sup>CD3<sup>+</sup>CD4<sup>-</sup>CD8<sup>+</sup>; **Heart1.** Neutrophils (Neut): CD45<sup>+</sup>CD11b<sup>+</sup>Ly6G<sup>+</sup>Ly6C<sup>-</sup>F4/80<sup>-</sup>, Ly6C high monocytes (Ly6C<sup>hi</sup> mono): CD45<sup>+</sup>CD11b<sup>+</sup>Ly6G<sup>-</sup>Ly6C<sup>hi</sup>F4/80<sup>-</sup>, Macrophages (Mac): CD45<sup>+</sup>CD11b<sup>+</sup>Ly6G<sup>-</sup>Ly6C<sup>-</sup>F4/80<sup>+</sup>; **Heart2.** Neut: CD45<sup>+</sup>CD11b<sup>+</sup>Ly6G<sup>+</sup>Ly6C<sup>-</sup>CD64<sup>-</sup>, Ly6C<sup>hi</sup> mono: CD45<sup>+</sup>CD11b<sup>+</sup>Ly6G<sup>-</sup>Ly6C<sup>hi</sup>CD64<sup>+</sup>, Mac: CD45<sup>+</sup>CD11b<sup>+</sup>Ly6G<sup>-</sup>Ly6C<sup>-</sup>CD64<sup>+</sup>. Macrophages were further subdivided into subsets using antibodies against CCR2, MHCII, and Lyve1. Gating strategy of peripheral blood and heart1 is as reported in our previous studies (5, 46).

**A**

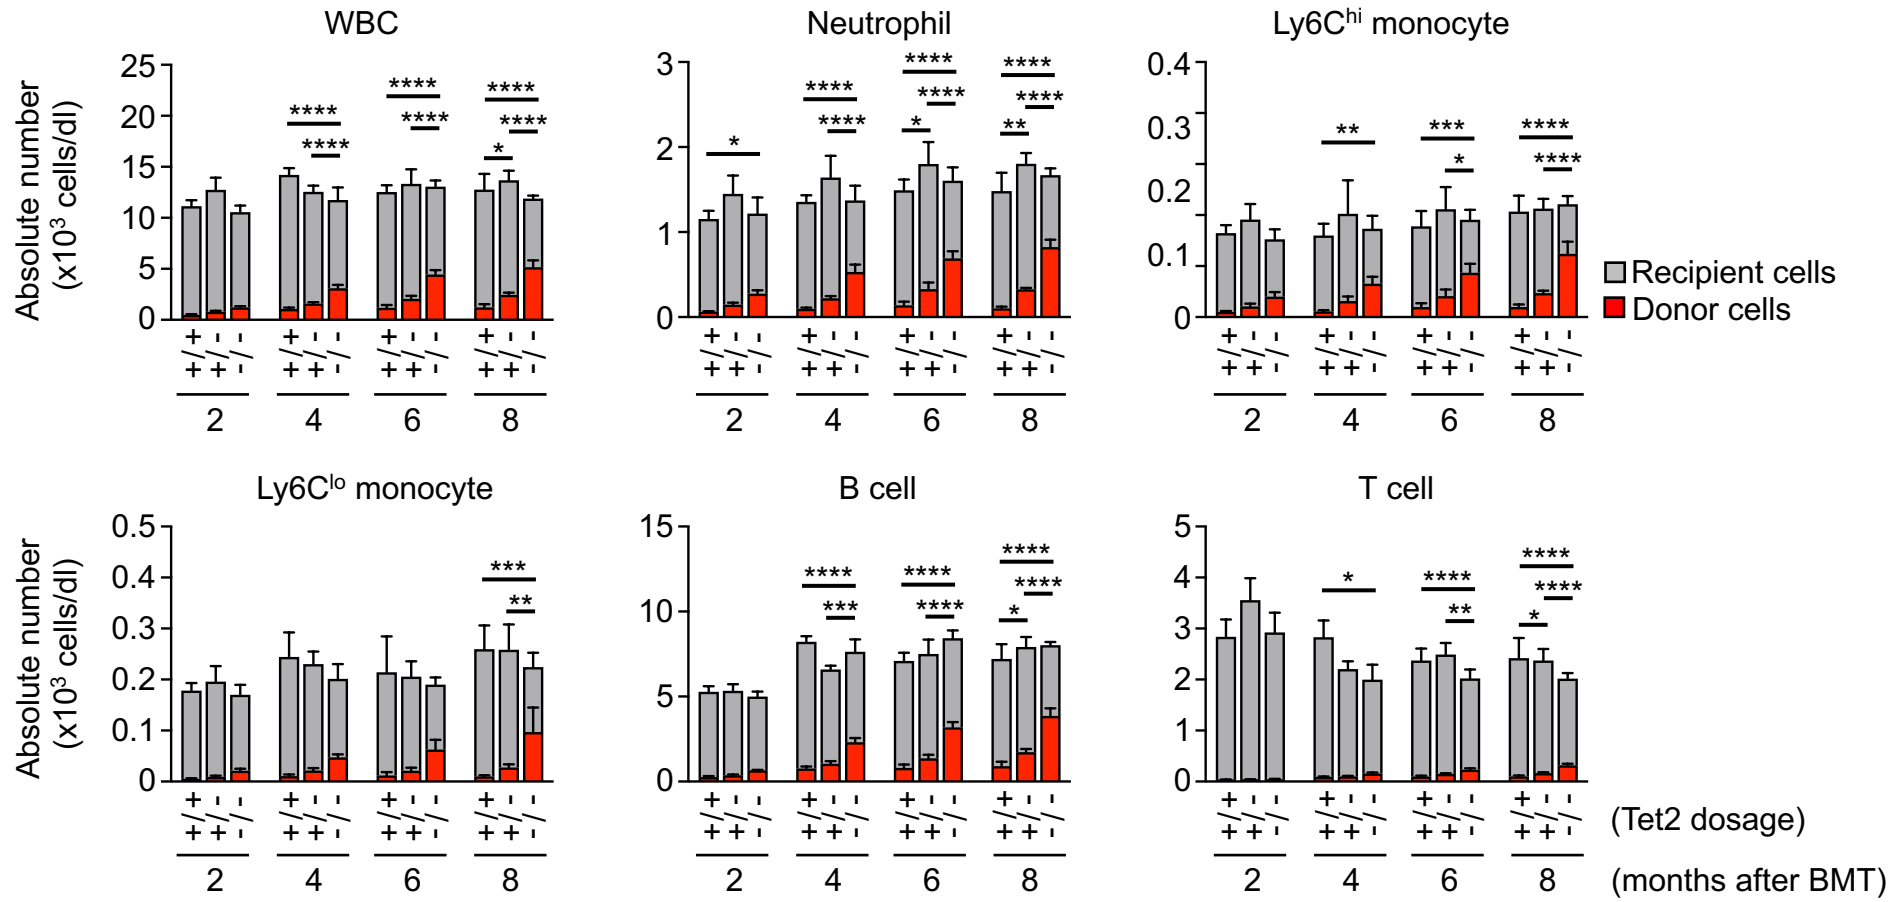

**B**

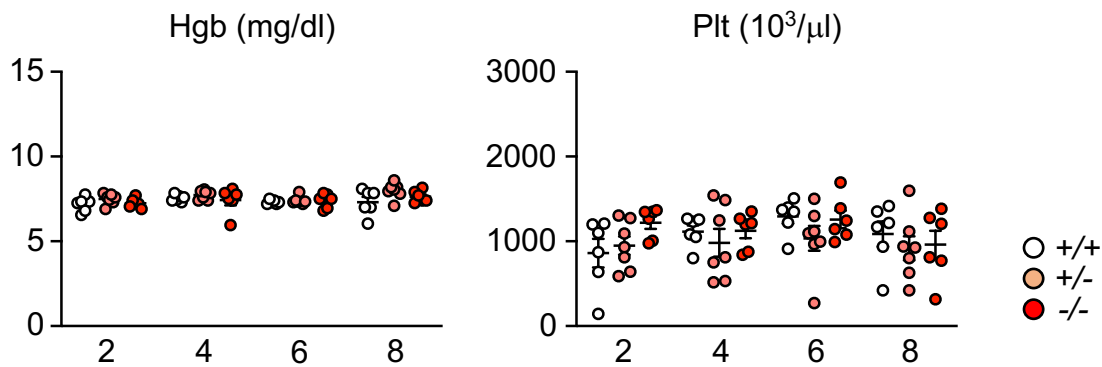

**Supplemental Figure 2. Transplantation of *Tet2* loss-of-function cells in non-conditioned mice leads to a dose-dependent increase in chimerism in peripheral blood over the time course, while it is not associated with overt changes in hemoglobin or platelet count (see Figure 2). A.** Flow cytometry analysis of peripheral blood at the indicated time points. **B.** Analysis of peripheral blood parameters of mice from each group. N=6-7 per genotype. Statistical analysis was performed with 2-way repeated-measures ANOVA with Tukey multiple-comparison tests. \* $p < 0.05$ , \*\* $p < 0.01$ , \*\*\* $p < 0.001$ , \*\*\*\* $p < 0.0001$ .

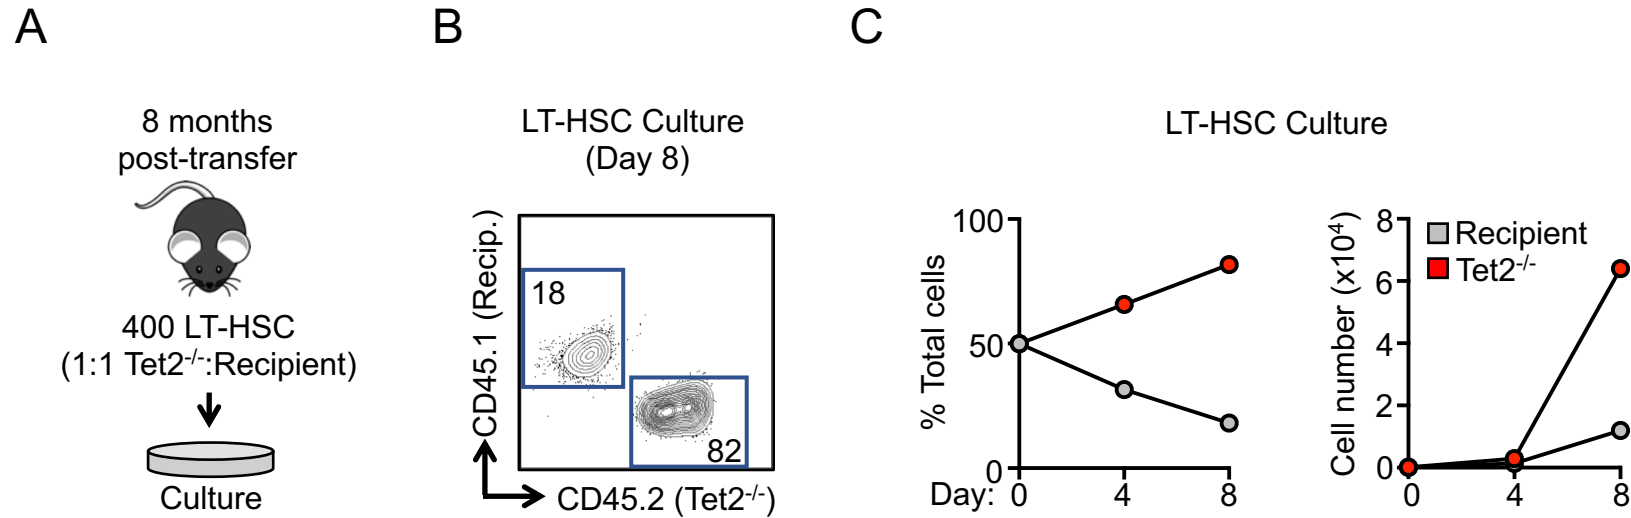

**Supplemental Figure 3. Competitive culture analysis of *Tet2*-deficient donor HSC.** **A.** Experimental design. **B.** Representative FACS plots showing frequency of donor and recipient cells at culture day 8. **C.** Absolute number of cells derived from *Tet2*-deficient donor HSC and WT recipient HSC. **D.** Representative FACS plots and **E.** absolute number of donor- and recipient HSC-derived LSK- and LK cells. N=1.

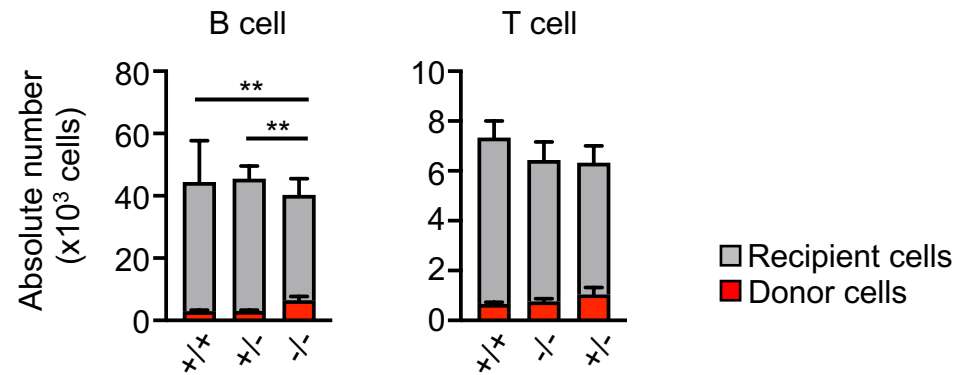

**Supplemental Figure 4. *Tet2*-mediated clonal hematopoiesis modulates age-related immunological remodeling of the heart (lymphoid populations).** Chimerism and absolute number of B220<sup>+</sup> B cells and CD3<sup>+</sup> T cells derived from *Tet2*-deficient donor HSC and wild-type recipient HSC. Statistical analysis was performed with 2-way repeated-measures ANOVA with Tukey multiple-comparison tests. \* $p < 0.05$ , \*\* $p < 0.01$

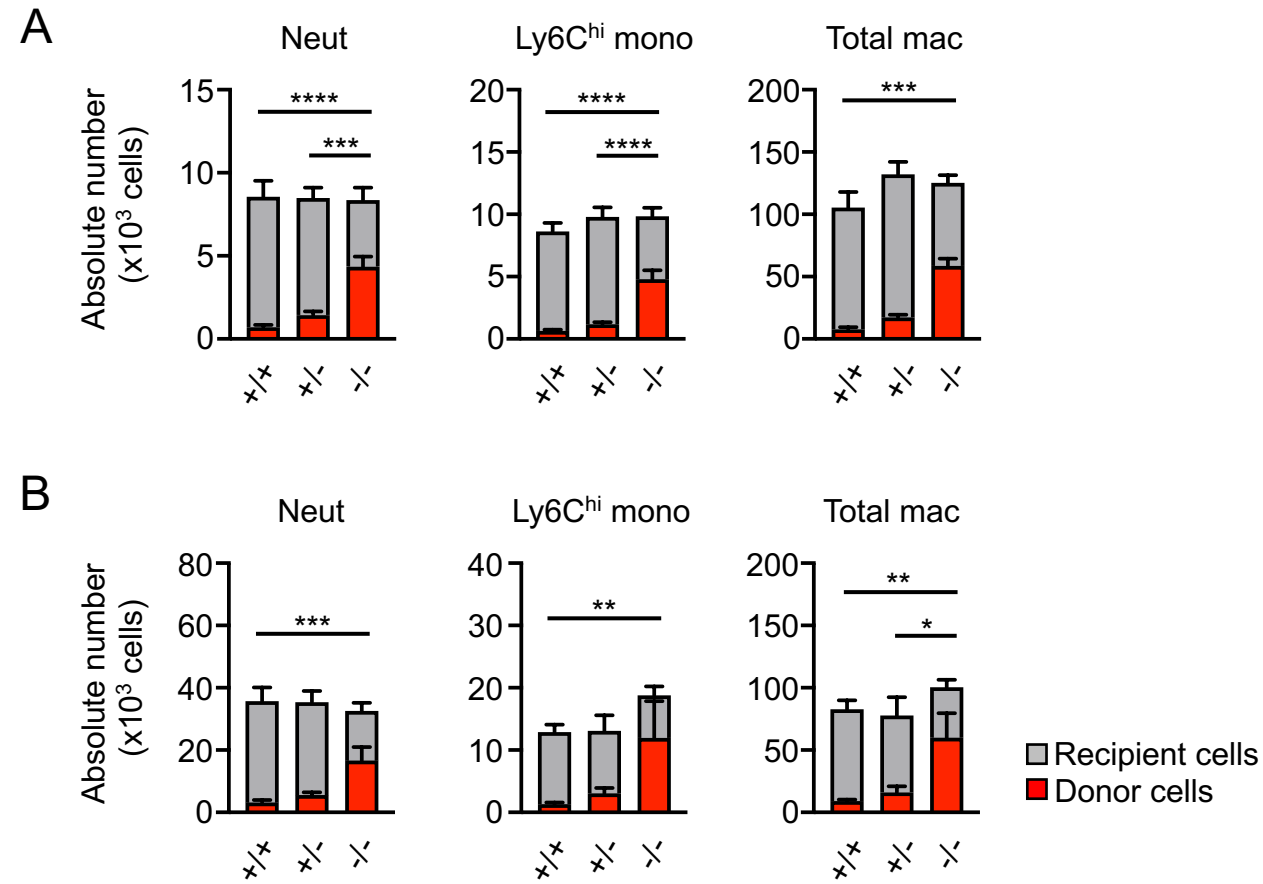

**Supplemental Figure 5. Transplantation of *Tet2* loss-of-function cells in non-conditioned mice leads to the replacement of resident immune cells in kidney (A) and liver (B).** N=6-7 per genotype. Statistical analysis was performed with one-way ANOVA with Tukey multiple-comparison test (kidney: Neut) or Kruskal-Wallis H test with Dunn's multiple-comparison tests (Kidney: Ly6C<sup>hi</sup> mono, total mac; Liver: Neut, Ly6C<sup>hi</sup> mono, total mac). \* $p < 0.05$ , \*\* $p < 0.01$ , \*\*\* $p < 0.001$ , \*\*\*\* $p < 0.0001$ .



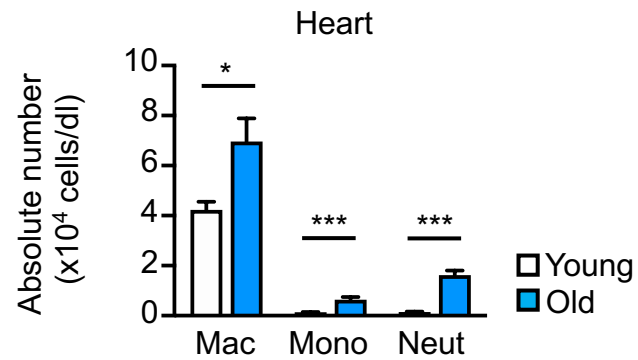

**Supplemental Figure 6. Comparison of absolute numbers of cardiac immune cells between young and old mice under homeostatic conditions.** N=8-10 per group analyzed at ages 8 weeks and 20 months. Statistical analysis was performed with two-tailed unpaired Student's *t* test with Welch's correction (Mac) and Mann-Whitney U tests (Mono, Neut). \* $p < 0.05$ , \*\*\* $p < 0.001$ .

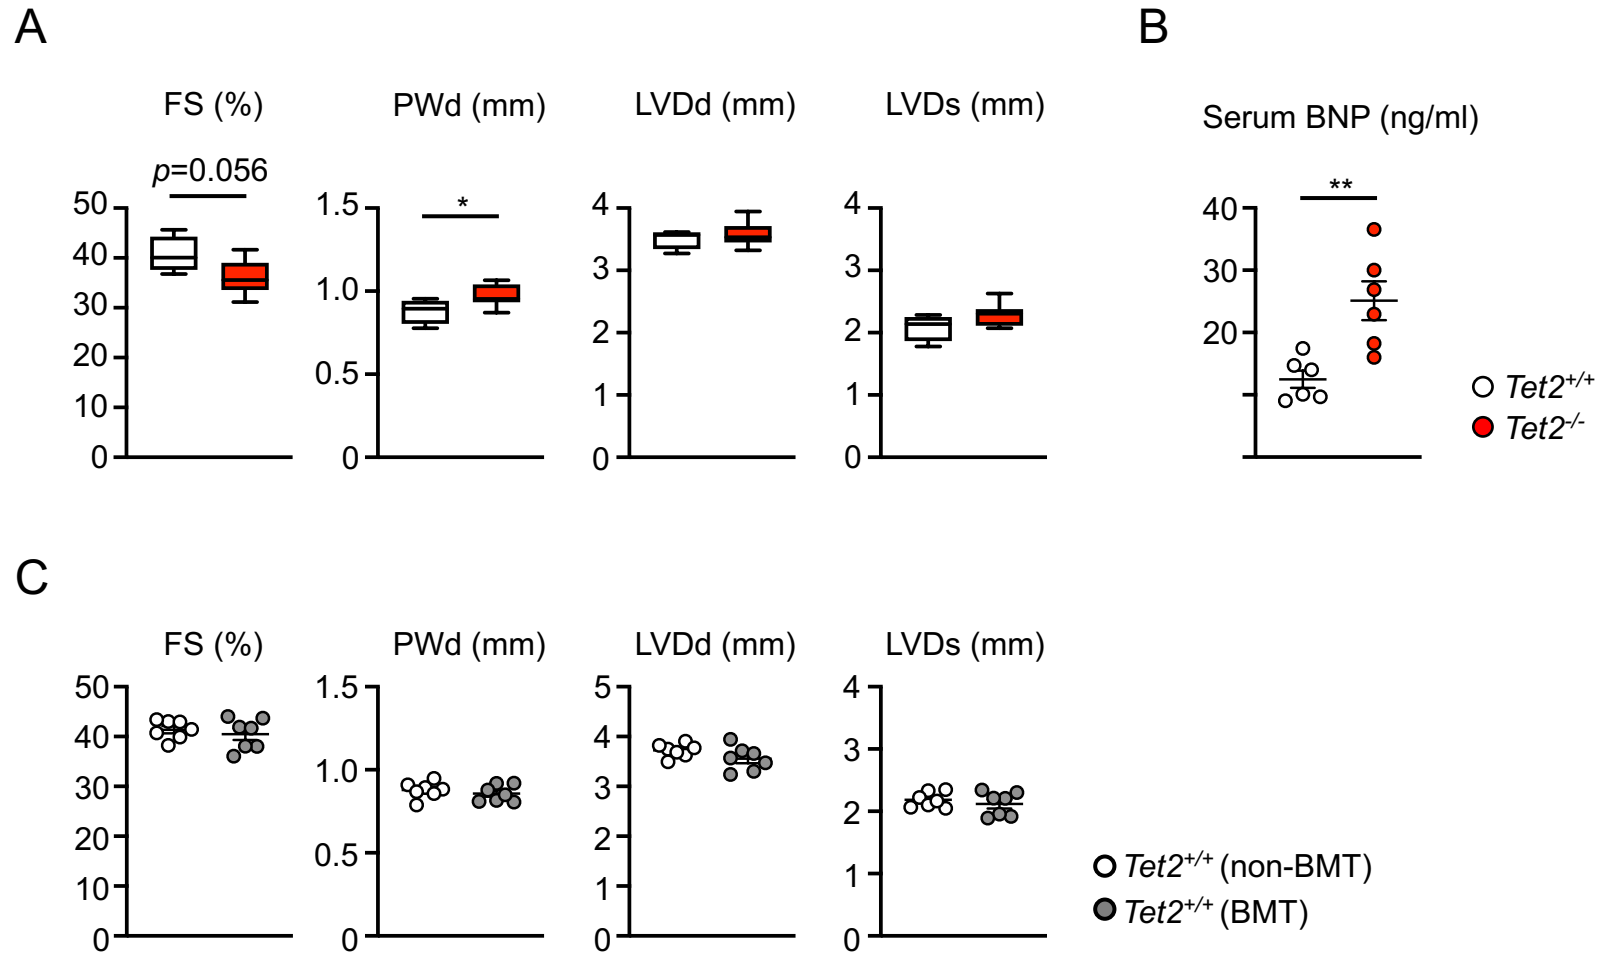

**Supplemental Figure 7. *Tet2*-mediated clonal hematopoiesis accelerates age-related cardiac dysfunction as early as 8 months after bone marrow transplantation.** **A.** Data of echocardiography analysis at 8 months show decreases in cardiac function in mice with *Tet2*-mediated clonal hematopoiesis. **B.** Serum BNP levels at 8 months. N=6 per genotype. **C.** Echocardiography analysis at 8 months to show comparable cardiac function between non-transplanted mice and mice transplanted with *Tet2*<sup>+/+</sup> cells. Statistical analysis was performed with two-tailed unpaired Student's *t* tests. \* $p < 0.05$ , \*\* $p < 0.01$ .

**Supplemental Table 3. Statistical information of ORA pathway analysis in *Tet2*-sufficient and *Tet2*-deficient donor bone marrow-derived cardiac macrophages (related to Table 1).**

| <b><u>Enriched in <i>Tet2</i>-sufficient cardiac macrophages</u></b> | <b>No. of genes</b> | <b><i>p</i> Value</b> | <b>FDR</b> |
|----------------------------------------------------------------------|---------------------|-----------------------|------------|
| Regulation of cell differentiation                                   | 232                 | <0.05                 | <0.05      |
| Neurogenesis                                                         | 218                 | <0.05                 | <0.05      |
| Cell projection organization                                         | 201                 | <0.05                 | <0.05      |
| Response to endogenous stimulus                                      | 191                 | <0.05                 | <0.05      |
| Regulation of anatomical structure morphogenesis                     | 169                 | <0.05                 | <0.05      |
| Cellular component morphogenesis                                     | 151                 | <0.05                 | <0.05      |
| <br>                                                                 |                     |                       |            |
| <b><u>Enriched in <i>Tet2</i>-deficient cardiac macrophages</u></b>  | <b>No. of genes</b> | <b><i>p</i> Value</b> | <b>FDR</b> |
| Immune response                                                      | 112                 | <0.05                 | <0.05      |
| Regulation of immune system process                                  | 99                  | <0.05                 | <0.05      |
| Cell activation                                                      | 64                  | <0.05                 | <0.05      |
| Response to cytokine                                                 | 58                  | <0.05                 | <0.05      |
| Immune effector process                                              | 55                  | <0.05                 | <0.05      |
| Leukocyte differentiation                                            | 45                  | <0.05                 | <0.05      |

Top significant Gene Ontology (GO) biological terms related to upregulated 444 genes and downregulated 1527 genes in the *Tet2*<sup>-/-</sup> cardiac macrophages. Number of genes, *p* value, and FDR are shown.

## Supplemental Table 4. Flow cytometry antibodies used in this study

### PERIPHERAL BLOOD

| ANTIBODIES      | FLUOROPHORE  | CLONE    | SOURCE         | IDENTIFIER                         |
|-----------------|--------------|----------|----------------|------------------------------------|
| Anti-CD45.1     | PE-Cy7       | A20      | Thermo Fisher  | Cat# 25-0453-82; RRID: AB_469629   |
| Anti-CD45.2     | eFluor450    | 104      | Thermo Fisher  | Cat# 48-0454-82; RRID: AB_11042125 |
| Anti-CD115      | PE           | AFS98    | Thermo Fisher  | Cat# 12-1152-82; RRID: AB_465808   |
| Anti-CD3e       | PE-eFluor610 | 145-2C11 | Thermo Fisher  | Cat# 61-0031-82; RRID: AB_2574514  |
| Anti-CD4        | FITC         | RM4-5    | Thermo Fisher  | Cat# 11-0042-82; RRID: AB_464896   |
| Anti-CD8a       | BV510        | 53-6.7   | BioLegend      | Cat# 100751; RRID: AB_2561389      |
| Anti-Ly6C       | APC          | AL-21    | BD Biosciences | Cat# 560595                        |
| Anti-CD45R/B220 | APC-Cy7      | RA3-6B2  | BD Biosciences | Cat# 552094                        |
| Anti-Ly6G       | PerCP-Cy5.5  | 1A8      | BD Biosciences | Cat# 560602                        |

### BONE MARROW

| ANTIBODIES                   | FLUOROPHORE     | CLONE    | SOURCE        | IDENTIFIER                        |
|------------------------------|-----------------|----------|---------------|-----------------------------------|
| Anti-CD11b                   | (Biotin)        | M1/70    | BioLegend     | Cat# 101204; RRID: AB_312787      |
| Anti-Ly6G/Ly6C (Gr-1)        | (Biotin)        | RB6-8C5  | BioLegend     | Cat# 108404; RRID: AB_313369      |
| Anti-TER-119                 | (Biotin)        | TER-119  | BioLegend     | Cat# 116204; RRID: AB_313705      |
| Anti-CD45R/B220              | (Biotin)        | RA3-6B2  | BioLegend     | Cat# 103204; RRID: AB_312989      |
| Anti-CD3e                    | (Biotin)        | 145-2C11 | BioLegend     | Cat# 100304; RRID: AB_312669      |
| Anti-CD127 (IL-7R $\alpha$ ) | (Biotin)        | A7R34    | BioLegend     | Cat# 135006; RRID: AB_2126118     |
| Streptavidin                 | BV650           |          | BioLegend     | Cat# 405232                       |
| Anti-CD117(c-kit)            | APC             | 2B8      | BioLegend     | Cat# 105812; RRID: AB_313221      |
| Anti-Ly-6A/E (Sca-1)         | PE/Cy7          | D7       | BioLegend     | Cat# 108114; RRID: AB_493596      |
| Anti-CD135 (Flk-2)           | PE              | A2F10    | BioLegend     | Cat# 135306; RRID: AB_1877217     |
| Anti-CD48                    | BV421           | RAM34    | Thermo Fisher | Cat# 103427; RRID: AB_10895922    |
| Anti-CD150                   | PerCP-eFluor710 | mShad150 | Thermo Fisher | Cat# 46-1502-82; RRID: AB_2016699 |
| Anti-CD45.1                  | BV711           | A20      | BioLegend     | Cat# 110739; RRID: AB_2562605     |
| Anti-CD45.2                  | BV785           | 104      | BioLegend     | Cat# 109839; RRID: AB_2562604     |
| Live Dead Stain              | Zombie Aqua     |          | BioLegend     | Cat# 423102                       |

## Supplemental Table 4 continued

### HEART 1

| ANTIBODIES      | FLUOROPHORE  | CLONE  | SOURCE    | IDENTIFIER                    |
|-----------------|--------------|--------|-----------|-------------------------------|
| Anti-CD45       | Pacific Blue | 30-F11 | BioLegend | Cat# 103126; RRID: AB_493535  |
| Anti-CD11b      | APC-Cy7      | M1/70  | BioLegend | Cat# 101226; RRID: AB_830642  |
| Anti-Ly6G       | PE           | 1A8    | BioLegend | Cat# 127602; RRID: AB_1089180 |
| Anti-Ly6C       | FITC         | HK1.4  | BioLegend | Cat# 128006; RRID: AB_1186135 |
| Anti-F4/80      | PE-Cy7       | BM8    | BioLegend | Cat# 123116; RRID: AB_893481  |
| Live Dead Stain | Zombie Aqua  |        | BioLegend | Cat# 423102                   |

### HEART 2

| ANTIBODIES      | FLUOROPHORE | CLONE       | SOURCE        | IDENTIFIER                         |
|-----------------|-------------|-------------|---------------|------------------------------------|
| CD45.1          | PE          | A20         | BioLegend     | Cat# 110708; RRID: AB_313497       |
| CD45.2          | PerCP-Cy5.5 | 104         | BioLegend     | Cat# 109828; RRID: AB_893350       |
| Anti-Ly6G       | PE-Cy7      | 1A8         | BioLegend     | Cat# 127618; RRID: AB_1877261      |
| Anti-Ly6C       | FITC        | HK1.4       | BioLegend     | Cat# 128006; RRID: AB_1186135      |
| Anti-CD64       | BV711       | X54-5/7.1   | BioLegend     | Cat# 139311; RRID: AB_2563846      |
| Anti-CCR2       | BV421       | SA203G11    | BioLegend     | Cat# 150605; RRID: AB_2571913      |
| Anti-MHCII      | APC-Cy7     | M5/114.15.2 | BioLegend     | Cat# 107627; RRID: AB_1659252      |
| Anti-LYVE1      | eFluor 660  | ALY7        | Thermo Fisher | Cat# 50-0443-82; RRID: AB_10597449 |
| Live Dead Stain | Zombie Aqua |             |               | Cat# 423102                        |
